# Supplementary material for: Multifunctional MXene composite aerogels modified via hyperbranched gels
Source: Royal Society of Chemistry journal article supplement (doi:10.1039/d4ta03888f), 2024-01-01
Supplement: d4ta03888f1.pdf [file d4ta03888f1.pdf]

## **Multifunctional MXene Composite Aerogels Modified via Hyperbranched Gels**

*Tairan Wang, Hengzhi Zhang, Shengwei Tang, Chunyang Jia\**

Tairan Wang, Hengzhi Zhang, Shengwei Tang, Chunyang Jia  
National Key Laboratory of Electronic Thin Films and Integrated Devices,  
School of Integrated Circuit Science and Engineering  
University of Electronic Science and Technology of China  
Chengdu 610054, P. R. China  
E-mail: [cjia@uestc.edu.cn](mailto:cjia@uestc.edu.cn)

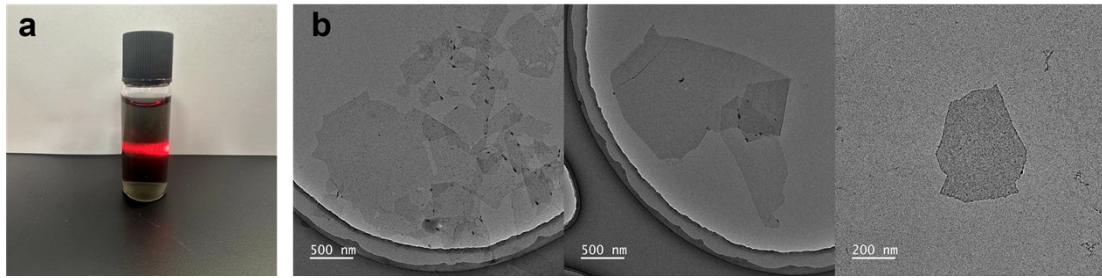

Fig. S1 (a) Photo of Tyndall effect of MXene dispersion. (b) TEM image of single/few layer MXene nanosheets.

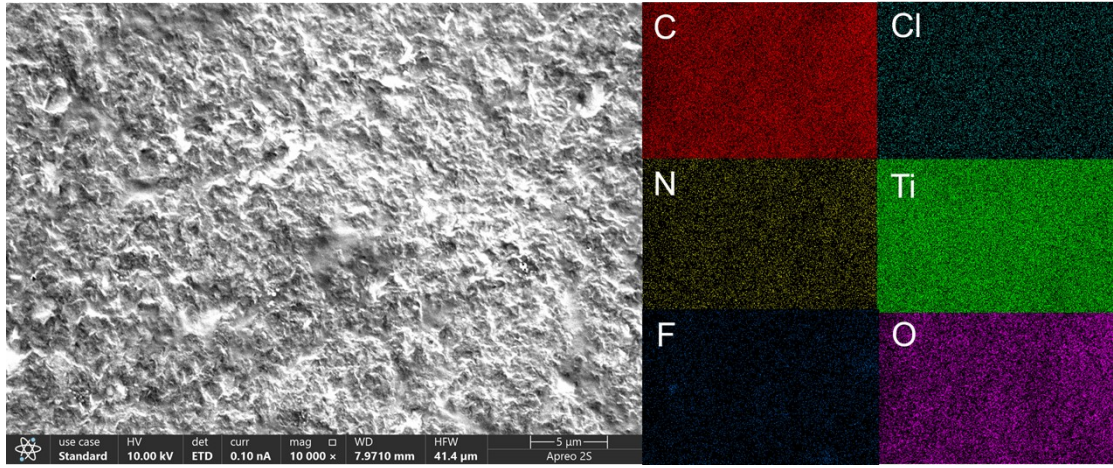

Fig. S2 Mapping image of aerogel  $M_1H_1$ .

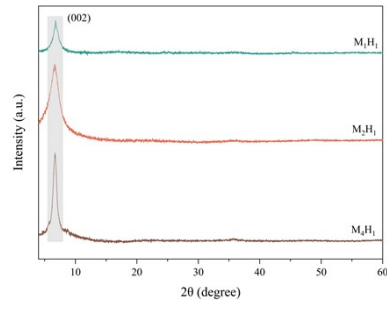

Fig. S3 XRD patterns of aerogel  $M_4H_1$ ,  $M_2H_1$  and  $M_1H_1$ .

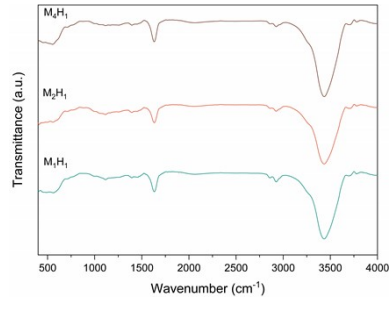

Fig. S4 FT-IR spectra of aerogel  $M_4H_1$ ,  $M_2H_1$  and  $M_1H_1$ .

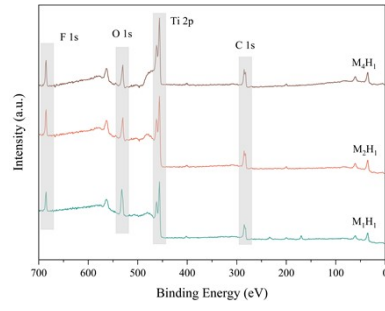

Fig. S5 Total XPS spectra of aerogel M<sub>4</sub>H<sub>1</sub>, M<sub>2</sub>H<sub>1</sub> and M<sub>1</sub>H<sub>1</sub>.

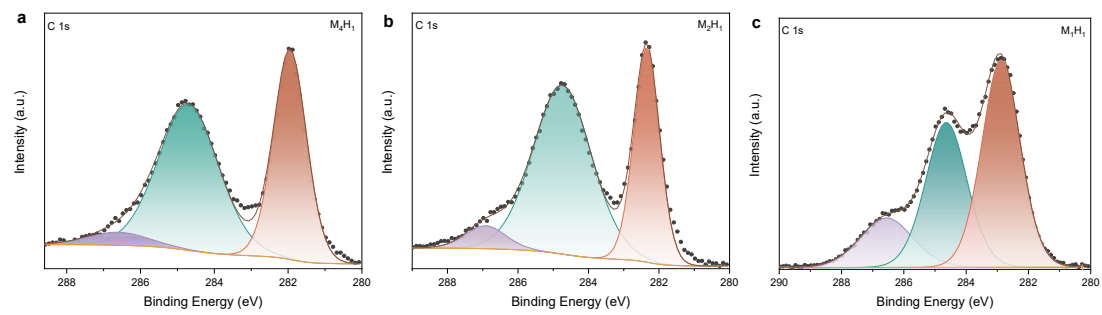

Fig. S6 XPS spectra of C 1S of (a) aerogel  $M_4H_1$ , (b)  $M_2H_1$  (c) and  $M_1H_1$ .

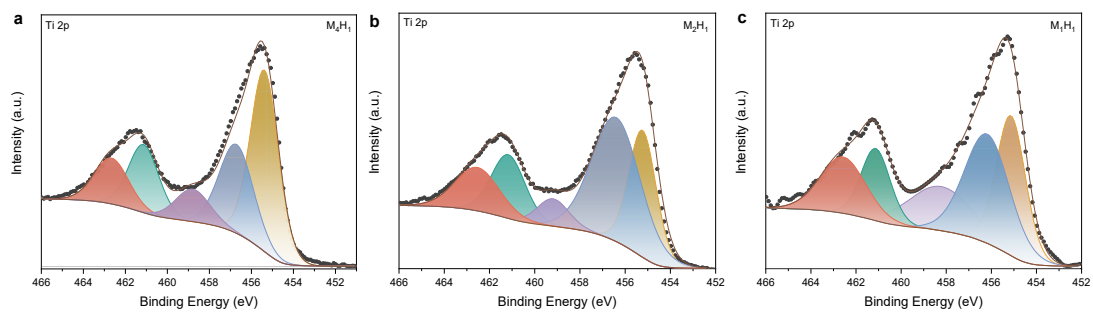

Fig. S7 XPS spectra of Ti 2p of (a) aerogel M<sub>4</sub>H<sub>1</sub>, (b) M<sub>2</sub>H<sub>1</sub> (c) and M<sub>1</sub>H<sub>1</sub>.



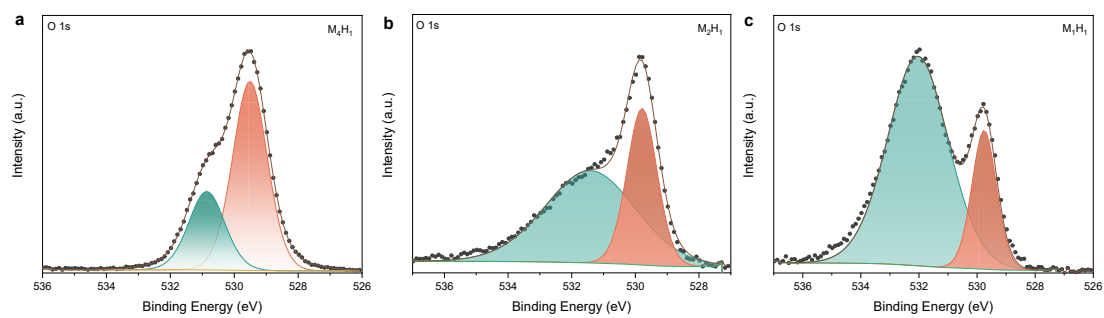

Fig. S8 XPS spectra of O 1S of (a) aerogel  $M_4H_1$ , (b)  $M_2H_1$  (c) and  $M_1H_1$ .

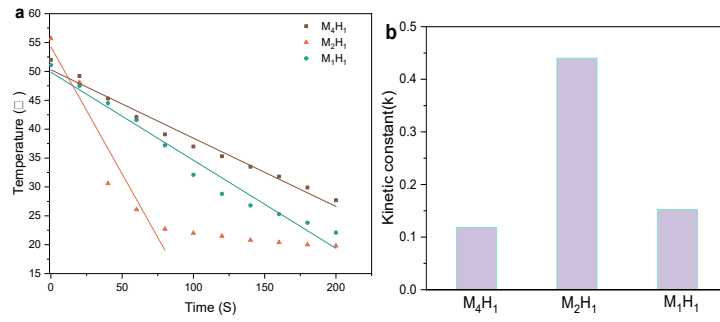

Fig. S9 (a) Fitted curves of the cooling kinetics of the three aerogels. (b) Cooling kinetic constants  $k$  of the three aerogels.

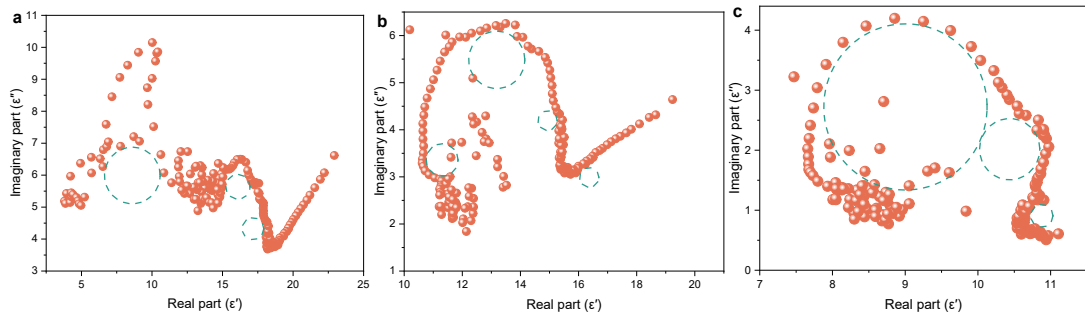

Fig. S10 Cole-Cole curves of (a)  $M_4H_1$ , (b)  $M_2H_1$ , and (c)  $M_1H_1$ .

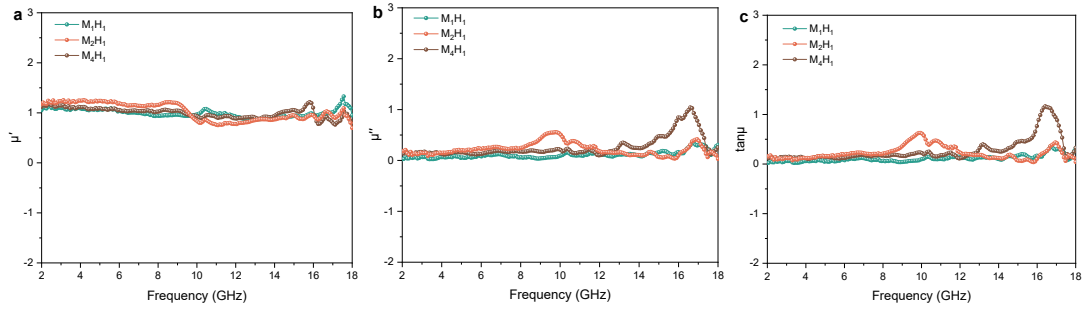

Fig. S11 Electromagnetic parameters at different frequencies: (a)  $\mu'$ , (b)  $\mu''$  and (c)  $\tan \delta \mu$  of all samples.

Table. S1 Comparison of the performance of this study with previous studies in

countering multispectral detection.

| Materials                                                    | RL <sub>min</sub> (dB) | EAB (GHz) | Test temperature | Time   | Final temperature | Ref |
|--------------------------------------------------------------|------------------------|-----------|------------------|--------|-------------------|-----|
| GPCN                                                         | -56.5                  | 6.4       | 60°C             | 10 min | 33.2°C            | 1   |
| CAs                                                          | -25.8                  | 5.15      | 120°C            | 6 min  | 35.6°C            | 2   |
| PPM80                                                        | -56.76                 | 10.52     | 80°C             | 10 min | 44.1°C            | 3   |
| AMCA-2                                                       | -55.9                  | 4.7       | 120°C            | 3 min  | 37.7°C            | 4   |
| ATO/rGO                                                      | -40.92                 | 9.8       | 130°C            | /      | 45.5°C            | 5   |
| PC800@CuS                                                    | -61.5                  | 7.8       | 81.4°C           | 20 min | 39.5°C            | 6   |
| CRCCS                                                        | -56.1                  | 8.4       | 80.0°C           | 20 min | 58.4°C            | 7   |
| GG33                                                         | -63.52                 | 8.45      | 70.0°C           | 30 min | 34.8°C            | 8   |
| Co <sub>1.29</sub> Ni <sub>1.71</sub> O <sub>4</sub> /rGO/CF | -53.45                 | 7.45      | 55°C             | 20 min | 25°C              | 9   |
| Ni/OMMC                                                      | -43.6                  | 5.6       | 70 °C            | 5 min  | 30.3 °C           | 10  |
| C/Fe <sub>3</sub> C                                          | -57.6                  | 7.8       | 85 °C            | 30 min | 33 °C             | 11  |
| CuS@rGO                                                      | -55.1                  | 7.2       | 120 °C           | 30 min | 26.8 °C           | 12  |

---

|                               |        |     |        |         |         |              |
|-------------------------------|--------|-----|--------|---------|---------|--------------|
| M <sub>2</sub> H <sub>1</sub> | -50.05 | 8.1 | 200 °C | 420 min | 45.2 °C | This<br>work |
|-------------------------------|--------|-----|--------|---------|---------|--------------|

---

## References

- 1 H. Zhao, Y. Cheng, Z. Zhang, B. Zhang, C. Pei, F. Fan and G. Ji, *Carbon*, 2021, **173**, 501-511.
- 2 X. Chen, M. Zhou, Y. Zhao, W. Gu, Y. Wu, S. Tang and G. Ji, *Green Chem.*, 2022, **24**, 5280-5290.
- 3 W. Gu, S. J. H. Ong, Y. Shen, W. Guo, Y. Fang, G. Ji and Z. J. Xu, *Adv. Sci.*, 2022, **9**, 2204165.
- 4 X. Chen, Z. Wang, M. Zhou, Y. Zhao, S. Tang and G. Ji, *Chem. Eng. J.*, 2023, **452**, 139110.
- 5 Y. Zhao, H. Qi, X. Dong, Y. Yang and W. Zhai, *ACS Nano*, 2023, **17**, 15615-15628.
- 6 X. Zhang, L. Cai, Z. Xiang and W. Lu, *Carbon*, 2021, **184**, 514-525.
- 7 Y. Gao, Q. Wu, L. Pan, X. Zhuang, F. Tian, X. Jia, Q. Man and B. Shen, *Chem. Eng. J.*, 2024, **484**, 149422.
- 8 Y. Cheng, X. Sun, S. Yang, D. Wang, L. Liang, S. Wang, Y. Ning, W. Yin and Y. Li, *Chem. Eng. J.*, 2023, **452**, 139376.
- 9 Y. Shi, X. Ding, K. Pan, Z. Gao, J. Du and J. Qiu, *J. Mater. Chem. A*, 2022, **10**, 7705-7717.
- 10 H. Du, J. Ren, W. Zhang and R. Yang, *Carbon*, 2023, **204**, 325-335.
- 11 G. Fang, T. He, X. Hu, X. Yang, S. Zheng, G. Xu and C. Liu, *Chem. Eng. J.*, 2023, **467**, 143266.
- 12 Y. Wu, Y. Zhao, M. Zhou, S. Tan, R. Peymanfar, B. Aslibeiki and G. Ji, *Nano-Micro Lett.*, 2022, **14**, 171.
